# Supplementary material
Source: PubMed Central journal article supplement (PMC11584391)
Supplement: 41551_2024_1197_MOESM2_ESM.pdf [file 41551_2024_1197_MOESM2_ESM.pdf]

## Reporting Summary

Nature Portfolio wishes to improve the reproducibility of the work that we publish. This form provides structure for consistency and transparency in reporting. For further information on Nature Portfolio policies, see our [Editorial Policies](#) and the [Editorial Policy Checklist](#).

### Statistics

For all statistical analyses, confirm that the following items are present in the figure legend, table legend, main text, or Methods section.

- | n/a                                 | Confirmed                                                                                                                                                                                                                                                                                      |
|-------------------------------------|------------------------------------------------------------------------------------------------------------------------------------------------------------------------------------------------------------------------------------------------------------------------------------------------|
| <input type="checkbox"/>            | <input checked="" type="checkbox"/> The exact sample size ( $n$ ) for each experimental group/condition, given as a discrete number and unit of measurement                                                                                                                                    |
| <input type="checkbox"/>            | <input checked="" type="checkbox"/> A statement on whether measurements were taken from distinct samples or whether the same sample was measured repeatedly                                                                                                                                    |
| <input type="checkbox"/>            | <input checked="" type="checkbox"/> The statistical test(s) used AND whether they are one- or two-sided<br><i>Only common tests should be described solely by name; describe more complex techniques in the Methods section.</i>                                                               |
| <input checked="" type="checkbox"/> | <input type="checkbox"/> A description of all covariates tested                                                                                                                                                                                                                                |
| <input type="checkbox"/>            | <input checked="" type="checkbox"/> A description of any assumptions or corrections, such as tests of normality and adjustment for multiple comparisons                                                                                                                                        |
| <input type="checkbox"/>            | <input checked="" type="checkbox"/> A full description of the statistical parameters including central tendency (e.g. means) or other basic estimates (e.g. regression coefficient) AND variation (e.g. standard deviation) or associated estimates of uncertainty (e.g. confidence intervals) |
| <input type="checkbox"/>            | <input checked="" type="checkbox"/> For null hypothesis testing, the test statistic (e.g. $F$ , $t$ , $r$ ) with confidence intervals, effect sizes, degrees of freedom and $P$ value noted<br><i>Give <math>P</math> values as exact values whenever suitable.</i>                            |
| <input checked="" type="checkbox"/> | <input type="checkbox"/> For Bayesian analysis, information on the choice of priors and Markov chain Monte Carlo settings                                                                                                                                                                      |
| <input checked="" type="checkbox"/> | <input type="checkbox"/> For hierarchical and complex designs, identification of the appropriate level for tests and full reporting of outcomes                                                                                                                                                |
| <input type="checkbox"/>            | <input checked="" type="checkbox"/> Estimates of effect sizes (e.g. Cohen's $d$ , Pearson's $r$ ), indicating how they were calculated                                                                                                                                                         |

*Our web collection on [statistics for biologists](#) contains articles on many of the points above.*

### Software and code

Policy information about [availability of computer code](#)

Data collection

Data analysis

For manuscripts utilizing custom algorithms or software that are central to the research but not yet described in published literature, software must be made available to editors and reviewers. We strongly encourage code deposition in a community repository (e.g. GitHub). See the Nature Portfolio [guidelines for submitting code & software](#) for further information.

### Data

Policy information about [availability of data](#)

All manuscripts must include a [data availability statement](#). This statement should provide the following information, where applicable:

- Accession codes, unique identifiers, or web links for publicly available datasets
- A description of any restrictions on data availability
- For clinical datasets or third party data, please ensure that the statement adheres to our [policy](#)

The main data supporting the results of this study are available within the paper and its supplementary information. Whole-slide images of human tumour sections cannot be made publicly available owing to regulatory constraints. Models and data will be made available to interested research partners on reasonable request to the corresponding author; the prerequisite for this is a data-transfer agreement, approved by the legal departments of the requesting researcher and by all legal departments of the institutions that provided data for the study, as well as an ethics clearance.

## Research involving human participants, their data, or biological material

Policy information about studies with [human participants or human data](#). See also policy information about [sex, gender \(identity/presentation\), and sexual orientation](#) and [race, ethnicity and racism](#).

### Reporting on sex and gender

The sex of patients was assessed during anamnesis (self-reported) with the tumour entity and stage as the most important inclusion criteria. We correlated our findings with data from Harrington et al. (Clin Cancer Res. 7, 243; 2001), who only unspecifically reported the sex of patients ("Seventeen patients (nine males and eight females)"). As they included five patients with breast cancer, it is highly likely that five of eight female patients were allocated in the breast-cancer group, resulting in mainly male patients in the remaining cancer entities (lung, head and neck and glioma). Among our included patients, there was a comparable sex distribution with female patients with breast cancer and mainly male patients with lung and head and neck cancers. Taken together, sex was considered in the study design, yet gender was not.

### Reporting on race, ethnicity, or other socially relevant groupings

We did not assess race, ethnicity or other socially relevant characteristics of the included patients as they were only included on the basis of their tumor type and stage.

### Population characteristics

Participants of the retrospective study were included on the basis of their tumor type and stage, to allow a comparison with published data.

### Recruitment

Samples were collected from the archive of the Institute of Pathology of RWTH Aachen University Hospital.

### Ethics oversight

The study protocol was approved by the ethics commission of the medical faculty of RWTH Aachen University Hospital.

Note that full information on the approval of the study protocol must also be provided in the manuscript.

## Field-specific reporting

Please select the one below that is the best fit for your research. If you are not sure, read the appropriate sections before making your selection.

Life sciences  Behavioural & social sciences  Ecological, evolutionary & environmental sciences

For a reference copy of the document with all sections, see [nature.com/documents/nr-reporting-summary-flat.pdf](https://nature.com/documents/nr-reporting-summary-flat.pdf)

## Life sciences study design

All studies must disclose on these points even when the disclosure is negative.

### Sample size

Sample sizes were determined from existing data on end-point assay variability.

### Data exclusions

No data were excluded.

### Replication

Biological replicates were used to ensure data reproducibility. Animal studies were completed only once.

### Randomization

Animals were randomly assigned to the respective group. Randomization was completed via tumour volume for measurements of doxorubicin concentrations. Patient samples were included on the basis of tumor type and grade.

### Blinding

The investigators were blinded to treatment during the analyses.

## Reporting for specific materials, systems and methods

We require information from authors about some types of materials, experimental systems and methods used in many studies. Here, indicate whether each material, system or method listed is relevant to your study. If you are not sure if a list item applies to your research, read the appropriate section before selecting a response.

### Materials & experimental systems

- n/a Involved in the study
- Antibodies
- Eukaryotic cell lines
- Palaeontology and archaeology
- Animals and other organisms
- Clinical data
- Dual use research of concern
- Plants

### Methods

- n/a Involved in the study
- ChIP-seq
- Flow cytometry
- MRI-based neuroimaging

## Antibodies

|                 |                                                                                                                                                                                                                                                                                                                                                                                                                                                                                                                                                                                                                                                                                                                                                                                                                                                                                                                                                                                                                                                                                                                                                                          |
|-----------------|--------------------------------------------------------------------------------------------------------------------------------------------------------------------------------------------------------------------------------------------------------------------------------------------------------------------------------------------------------------------------------------------------------------------------------------------------------------------------------------------------------------------------------------------------------------------------------------------------------------------------------------------------------------------------------------------------------------------------------------------------------------------------------------------------------------------------------------------------------------------------------------------------------------------------------------------------------------------------------------------------------------------------------------------------------------------------------------------------------------------------------------------------------------------------|
| Antibodies used | <p>Primary antibodies</p> <p>Antigen Host Dilution Company &amp; Catalogue number</p> <p>Mouse CD31 (PECAM-1) Rat 1:100 BD Biosciences # 553370</p> <p>Mouse VEGFR2 extracellular domain Goat 1:20 R&amp;D Systems # AF644</p> <p>Mouse F4/80 (wide range of Macrophages) Rat 1:50 Bio-Rad # MCA497GA</p> <p>Murine and human Collagen Type I Rabbit 1:100 Novus Biologicals (NB600-408)</p> <p>Mouse Collagen IV Rabbit 1:100 Novotec # 20451 0.5ml</p> <p>Mouse Smooth Muscle Actin (ASM-1) Biotin 1:100 Progen # BK61501-1mg</p> <p>Mouse LYVE-1 Rabbit 1:50 abcam # ab14917</p> <p>Human CD31 Clone JC70A Mouse ready to use DAKO Code IR610</p> <p>Human CD68 Clone PG-M1 Mouse ready to use DAKO Code GA613</p> <p>Secondary antibodies</p> <p>Antigen Conjugate Dilution Company &amp; Catalogue number</p> <p>Rat IgG (H+L) Alexa Fluor 488 1:350 Dianova # 712-546-153</p> <p>Rat IgG (H+L) AMCA 1:50 Dianova # 712-155-153</p> <p>Rabbit IgG (H+L) Alexa Fluor 488 1:500 Dianova # 711-546-152</p> <p>Rabbit IgG (H+L) AMCA 1:50 Dianova # 111-155-003</p> <p>Goat IgG (H+L) AMCA 1:50 Dianova # 705-155-147</p> <p>Biotin Cy2 1:200 Dianova # 016-220-084</p> |
| Validation      | <p>The antibodies were part of a routine pathological staining (for human samples) or validated on murine tumour sections, and have been routinely used. The antibodies were used as suggested by the supplier and have been used in several studies (e.g. Moss, Jennifer I., et al. "High-resolution 3D visualization of nanomedicine distribution in tumors." <i>Theranostics</i> 10.2 (2020): 880.; Theek, Benjamin, et al. "Histidine-rich glycoprotein-induced vascular normalization improves EPR-mediated drug targeting to and into tumors." <i>Journal of controlled release</i> 282 (2018): 25-34.; Doleschel, Dennis, et al. "Regorafenib enhances anti-PD1 immunotherapy efficacy in murine colorectal cancers and their combination prevents tumor regrowth." <i>Journal of Experimental &amp; Clinical Cancer Research</i> 40.1 (2021): 1-14.)</p>                                                                                                                                                                                                                                                                                                         |

## Eukaryotic cell lines

Policy information about [cell lines and Sex and Gender in Research](#)

|                                                                   |                                                                                                                                                                                                                                                                                                              |
|-------------------------------------------------------------------|--------------------------------------------------------------------------------------------------------------------------------------------------------------------------------------------------------------------------------------------------------------------------------------------------------------|
| Cell line source(s)                                               | A431 (SigmaAldrich; female human patient), MLS (ATCC; female human patient), CT26 (ATCC; female mouse), SW620 (ATCC; male human patient), A549 (ATCC; male human patient), Calu-3 (ATCC; male human patient), Calu-6 (ATCC; female human patient), 4T1 (ATCC; female mouse), Hep-55.1.C (CLS; female mouse). |
| Authentication                                                    | The cell lines were only inspected by eye.                                                                                                                                                                                                                                                                   |
| Mycoplasma contamination                                          | The cell lines regularly tested negative for mycoplasma contamination (via PCR).                                                                                                                                                                                                                             |
| Commonly misidentified lines (See <a href="#">ICLAC</a> register) | No commonly misidentified cell lines were used.                                                                                                                                                                                                                                                              |

## Animals and other research organisms

Policy information about [studies involving animals; ARRIVE guidelines](#) recommended for reporting animal research, and [Sex and Gender in Research](#)

|                         |                                                                                                                                                                                                                                                                                                                                                                                                                                                                                                   |
|-------------------------|---------------------------------------------------------------------------------------------------------------------------------------------------------------------------------------------------------------------------------------------------------------------------------------------------------------------------------------------------------------------------------------------------------------------------------------------------------------------------------------------------|
| Laboratory animals      | Female CD1-nude, 6–8 weeks old. Female NMRI nude, 4–6 weeks old. Male CB.17 SCID, >18 g. Female CB.17 SCID, >18 g. Female Hsd:ATHymic Nude-Foxn1nu, > 18 g. Female BALB/c mice, > 18 g. Male C57BL/6J mice, > 18 g.                                                                                                                                                                                                                                                                               |
| Wild animals            | The study did not involve wild animals.                                                                                                                                                                                                                                                                                                                                                                                                                                                           |
| Reporting on sex        | Data were only reported in one sex per model but both sexes were used. Sex is not expected to impact the microenvironment of the tumour, so it was not deemed necessary to split established models across both sexes. We used male mice for the prostate cancer models, and female mice for the breast cancer models.                                                                                                                                                                            |
| Field-collected samples | The study did not involve samples collected from the field.                                                                                                                                                                                                                                                                                                                                                                                                                                       |
| Ethics oversight        | All animal experiments were approved by the responsible governmental review committees on animal care. All work conducted in the UK adhered to the Animal Scientific Procedures Act 1986 and complied with the Global Bioethics Policy. All experiments were detailed in approved project licenses outlining the exact type of research performed, and initially went through internal ethical review processes, followed by assessment and approval by the LANUV (Germany) and Home Office (UK). |

Note that full information on the approval of the study protocol must also be provided in the manuscript.

## Clinical data

Policy information about [clinical studies](#)

All manuscripts should comply with the ICMJE [guidelines for publication of clinical research](#) and a completed [CONSORT checklist](#) must be included with all submissions.

|                             |                                                                                                                                                                                                                                                                                                                                                                                                                                                                                                                                                                                                                                                                                                                                                                                                                                                                                                                                                         |
|-----------------------------|---------------------------------------------------------------------------------------------------------------------------------------------------------------------------------------------------------------------------------------------------------------------------------------------------------------------------------------------------------------------------------------------------------------------------------------------------------------------------------------------------------------------------------------------------------------------------------------------------------------------------------------------------------------------------------------------------------------------------------------------------------------------------------------------------------------------------------------------------------------------------------------------------------------------------------------------------------|
| Clinical trial registration | The trial was registered at the Medical Faculty of RWTH Aachen University (at the ethics committee, EK No. 22-294 and at the clinical trial center CTC-A, No. 21-359).                                                                                                                                                                                                                                                                                                                                                                                                                                                                                                                                                                                                                                                                                                                                                                                  |
| Study protocol              | The study protocol was not published, as only a retrospective study on samples from the archive of the Institute of Pathology was performed.                                                                                                                                                                                                                                                                                                                                                                                                                                                                                                                                                                                                                                                                                                                                                                                                            |
| Data collection             | <p>For the analysis of the tumour macrophages and blood vessels, samples (from tumour resections and biopsies) from breast (topography code: C50, ICD-O code: 8500/3 Infiltrating duct carcinoma, NOS), lung (topography code: C34, ICD-O code: 8070/3 squamous cell carcinoma, not other specified) and head and neck (topography codes: C02-C13, C32, C44, ICD-O code: 8070/3 squamous cell carcinoma, not other specified) were identified and retrieved from the routine diagnostic archive from the Institute of Pathology at RWTH Aachen University Hospital. In accordance with patient characteristics provided by Harrington et al. (Clin Cancer Res. 7, 243; 2001), tumours with a locally advanced (T3–T4) tumor stage according to the TNM classification were selected. Patients had not undergone neoadjuvant chemotherapy prior to surgery.</p> <p>Tumour sections were stained with standard pathology protocols for CD31 and CD68.</p> |
| Outcomes                    | Tumour blood vessels and macrophages were counted and correlated with the known liposome accumulation of breast, lung and head-and-neck cancer on the basis of accumulation values reported by Harrington et al. (Clin Cancer Res. 7, 243; 2001).                                                                                                                                                                                                                                                                                                                                                                                                                                                                                                                                                                                                                                                                                                       |
